# Supplementary material for: Non-Invasive whole-body detection of complement activation using radionuclide imaging in a mouse model of myocardial ischaemia-reperfusion injury
Source: PubMed Central journal article supplement (PMC5700950; doi:10.1038/s41598-017-16387-1), 2017-11-23

## **Supplementary Information**

Non-Invasive whole-body detection of complement activation using radionuclide imaging in a mouse model of myocardial ischaemia-reperfusion injury

### **Authors:**

Ehsan Sharif-Paghaleh<sup>1,2,3</sup>, May Lin Yap<sup>1</sup>↯, Sarah-Lena Puhl<sup>3</sup>↯, Adam Badar<sup>1</sup>, Julia Bagaña Torres<sup>1</sup>, Krisanat Chuamsaamarkkee<sup>1</sup>, Florian Kampmeier<sup>1</sup>, Richard A. Smith<sup>2</sup>, James Clark<sup>4</sup>, Philip J. Blower<sup>1</sup>, Steven Sacks<sup>2\*</sup> and Gregory E. Mullen<sup>1&2\*</sup>

↯: equal second authorship

\*: equal last authorship

### **Author Affiliation:**

<sup>1</sup> Division of Imaging Sciences and Biomedical Engineering, St Thomas' Hospital, King's College London, UK

<sup>2</sup> MRC Centre for Transplantation, King's College London, UK

<sup>3</sup> Department of Immunology, School of Medicine, Tehran University of Medical Sciences, Tehran, Iran

<sup>4</sup> Cardiovascular Division, Faculty of Life Sciences and Medicine, King's College London, UK

### **Contact Information\*:**

Prof Steven Sacks ([steven.sacks@kcl.ac.uk](mailto:steven.sacks@kcl.ac.uk))

MRC Centre for Transplantation, Guy's Hospital, Faculty of Life Sciences and Medicine, King's College London, England

Dr Greg Mullen ([greg.mullen@kcl.ac.uk](mailto:greg.mullen@kcl.ac.uk))

Division of Imaging and Biomedical Engineering, St Thomas' Hospital, Faculty of Life Sciences and Medicine, King's College London, England

**Figure S1: Myocardial IRI model setup.**

**Figure S2: SPECT-CT movie of imaging complement protein by  $^{99m}\text{Tc}$ -rCR2.** Images are shown for mice that underwent induction of IRI followed by injection of  $^{99m}\text{Tc}$ -rCR2 or the control peptides  $^{99m}\text{Tc}$ -PSMA or  $^{99m}\text{Tc}$ -K41E CR2, 1 hour prior to imaging. Images acquired using NanoSPECT-CT. (A) Whole body SPECT-CT imaging of BL/6 or  $\text{C3}^{-/-}$  mice injected with  $^{99m}\text{Tc}$ -rCR2 or  $^{99m}\text{Tc}$ -PSMA or  $^{99m}\text{Tc}$ -K41E CR2. (B) SPECT-CT movies of the chest region of mice.

**Figure S3: *Ex vivo* biodistribution studies validating the presence of  $^{99m}\text{Tc}$ -rCR2 in the post-ischaemic hearts.** After imaging studies, mice were culled and the hearts (a) and the rest of organs (b) were removed, weighed and subjected to *ex vivo* biodistribution analysis.

**Figure S4: *Ex vivo* organ biodistribution study following inhibition of complement activation and consequent C3d formation by Crry-Ig.** After imaging studies, mice injected with Crry-Ig to inhibit complement activation and hence reduce C3d formation were culled and hearts were removed and weighed and gamma-counted. Biodistribution data were expressed as the heart to blood ratio.

Supplementary Information

Fig 1

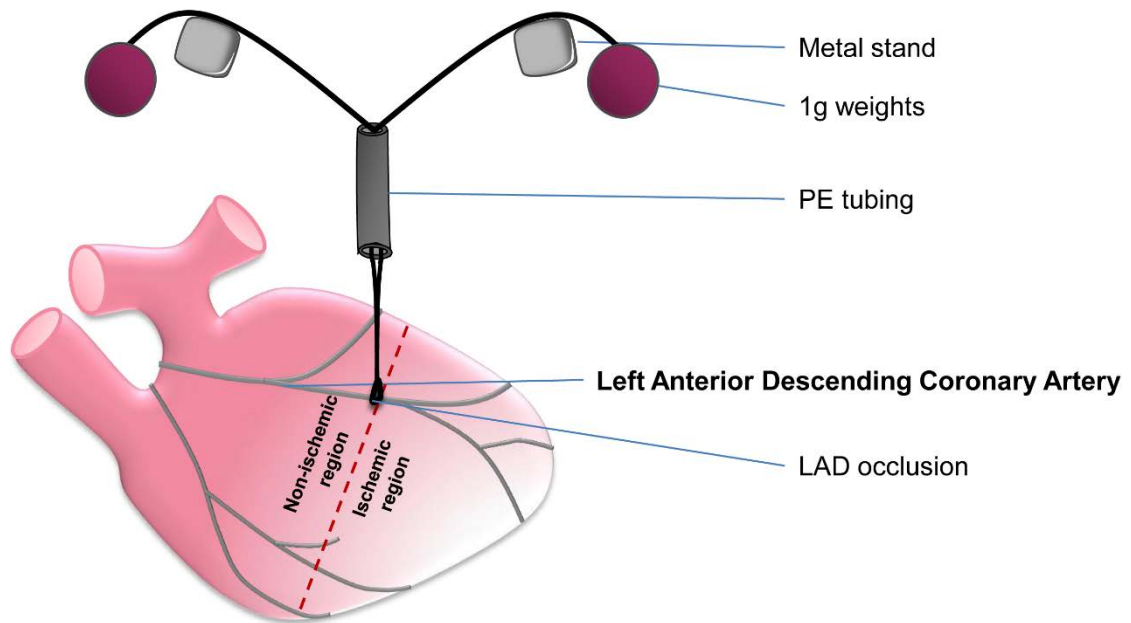

Video:

Fig 2

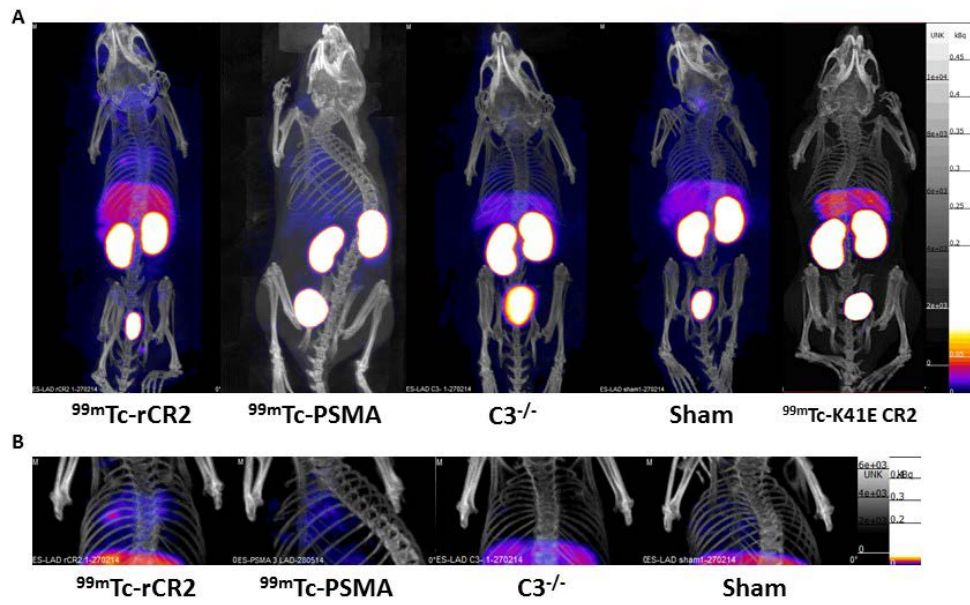

**Fig 3**

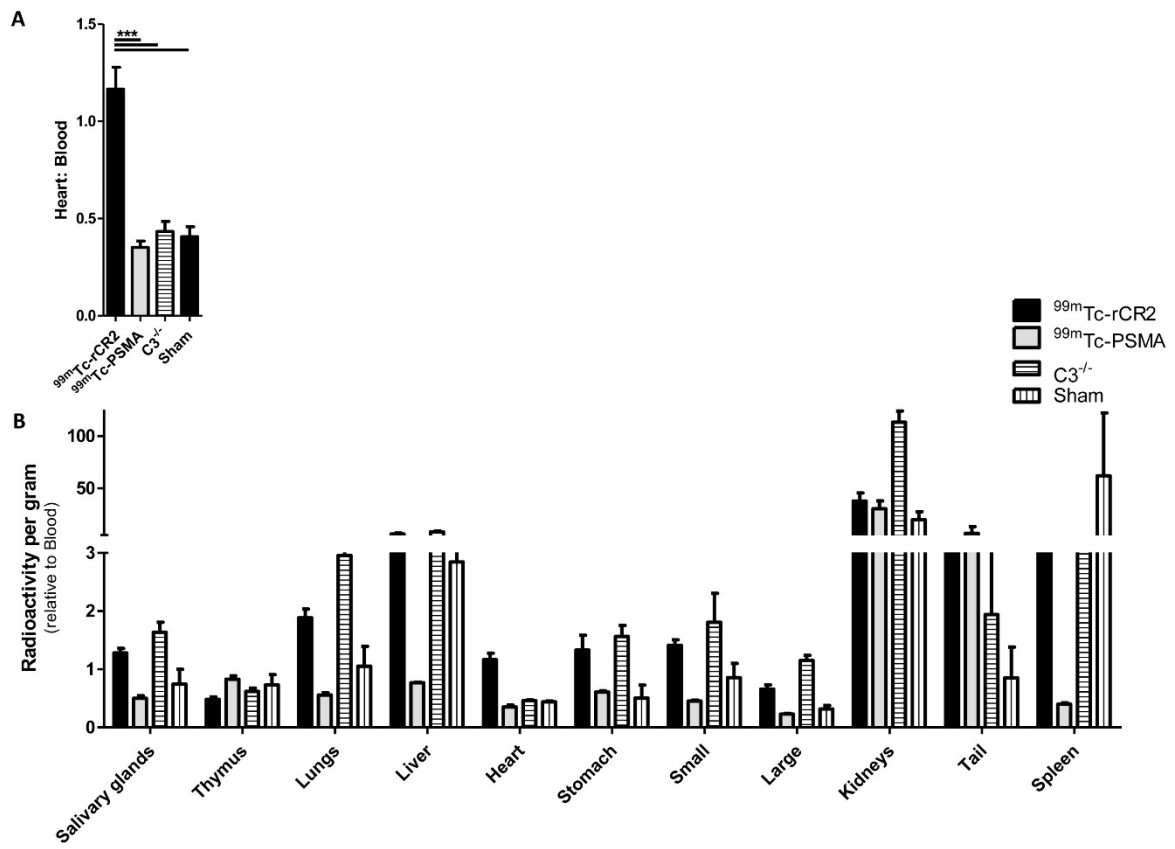

Fig 4

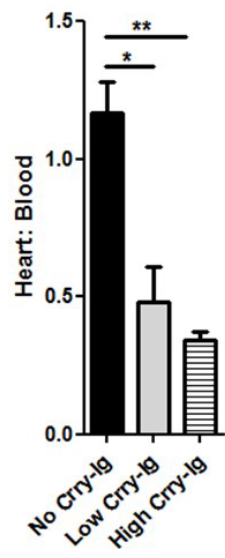

Supplement: 41598_2017_16387_MOESM1_ESM.pdf [file 41598_2017_16387_MOESM1_ESM.pdf]
